# Supplementary material for: The fabrication of In2O3/In2S3/Ag nanocubes for efficient photoelectrochemical water splitting
Source: Royal Society of Chemistry journal article supplement (doi:10.1039/c5cp05833c), 2015-12-17
Supplement: c5cp05833c1.pdf [file c5cp05833c1.pdf]

## Supporting Information

### Fabrication of $\text{In}_2\text{O}_3/\text{In}_2\text{S}_3/\text{Ag}$ nanocubes for efficient photoelectrochemical water splitting

Rui Xu<sup>1,‡</sup>, Haohua Li<sup>1,‡</sup>, Wenwen Zhang<sup>1</sup>, Zepeng Yang<sup>1</sup>, Guiwu Liu<sup>1,\*</sup>, Ziwei Xu<sup>1</sup>, Haicheng Shao<sup>1</sup> and Guanjun Qiao<sup>1,2,\*</sup>

<sup>1</sup> School of Materials Science and Engineering, Jiangsu University, Zhenjiang 212013, China

<sup>2</sup> State Key Laboratory for Mechanical Behavior of Materials, Xi'an Jiaotong University, Xi'an 710049,

China

‡ These authors contribute equally to this work.

Corresponding author: gwliu76@ujs.edu.cn (Guiwu Liu), gjqiao@ujs.edu.cn (Guanjun Qiao)

It could be concluded that the XRD results indicate that the  $\text{In}_2\text{O}_3$  and  $\text{In}_2\text{O}_3/\text{In}_2\text{S}_3$  nanocubes are successfully synthesized. However, the patterns of the Ag nanoparticles are not detected due to the small mass loading and uniform distribution, which could be investigated by EDS (Fig. S1). The EDS measurement was carried out at the  $\text{In}_2\text{O}_3/\text{Ag}$  (Fig. S1a) and  $\text{In}_2\text{O}_3/\text{In}_2\text{S}_3/\text{Ag}$  (Fig. S1b) heterostructured nanocubes. Apart from the carbon and copper peaks, sulfur, oxygen and indium signals can be observed. Ag peaks can also be observed in both Fig. S1a ( $\text{In}_2\text{O}_3/\text{Ag}$ ) and Fig. S1b ( $\text{In}_2\text{O}_3/\text{In}_2\text{S}_3/\text{Ag}$ ). In the Fig. S1b, the as-synthesized products  $\text{In}_2\text{O}_3/\text{In}_2\text{S}_3/\text{Ag}$  were grown on the FTO substrates and these substances are very few. Therefore, the ratio in  $\text{In}_2\text{O}_3/\text{In}_2\text{S}_3$  was carried out by EDS analysis. In the analysis of the EDS diagram (Fig. S1b), we concluded that the weight percent ratio of O:S is 30.80At%:12.20At%. And the stoichiometric ratio is approximately 2.5:1. It could be concluded that the  $\text{In}_2\text{O}_3/\text{Ag}$  and  $\text{In}_2\text{O}_3/\text{In}_2\text{S}_3/\text{Ag}$  nanocubes are successfully grown on the FTO substrates.

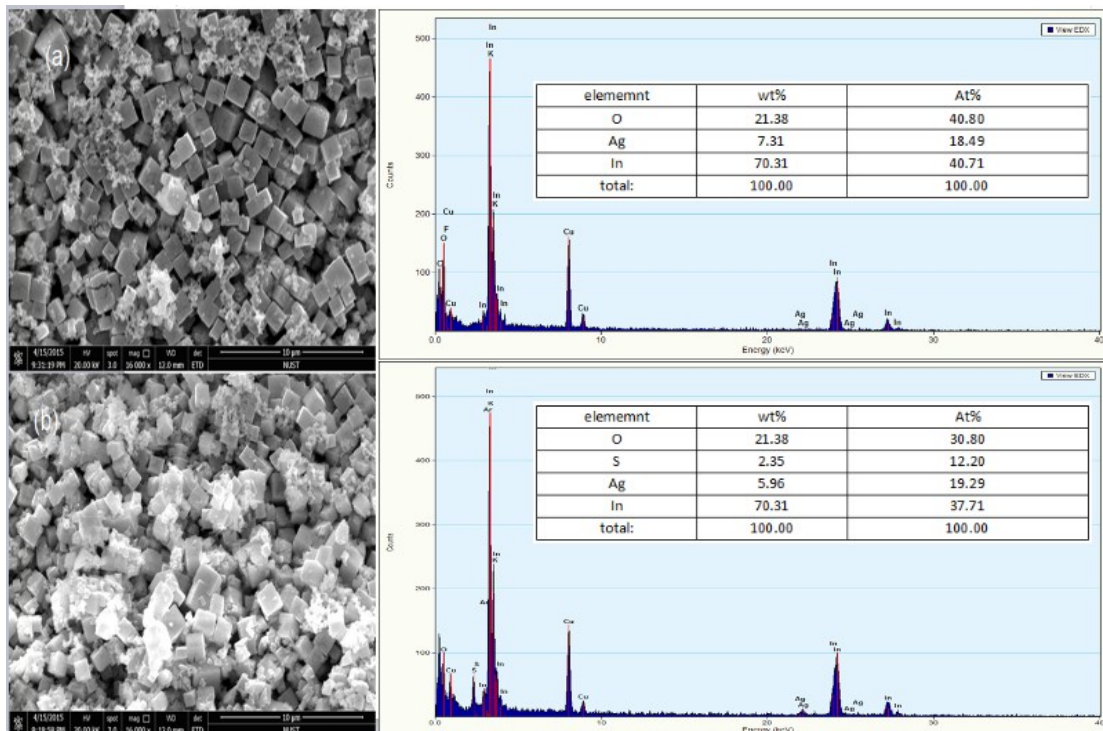

Fig. S1. SEM and EDS results for (a)  $\text{In}_2\text{O}_3/\text{Ag}$  and (b)  $\text{In}_2\text{O}_3/\text{In}_2\text{S}_3/\text{Ag}$  nanocubes.

The direct optical bandgap ( $E_g$ ) of the semiconductor nanomaterial can be

calculated from the equation  $((\alpha h\nu)^2 = A(h\nu - E_g))$ , where  $h\nu$  is the absorption coefficient, and  $A$  is a constant for the material[1]. As shown in Fig. S2, the calculated direct  $E_g$  value for four samples is about 2.87 eV for  $\text{In}_2\text{O}_3$ , 2.71 eV for  $\text{In}_2\text{O}_3/\text{Ag}$ , 2.30 eV for  $\text{In}_2\text{O}_3/\text{In}_2\text{S}_3$  and 2.25 eV for  $\text{In}_2\text{O}_3/\text{In}_2\text{S}_3/\text{Ag}$  nanocubes.

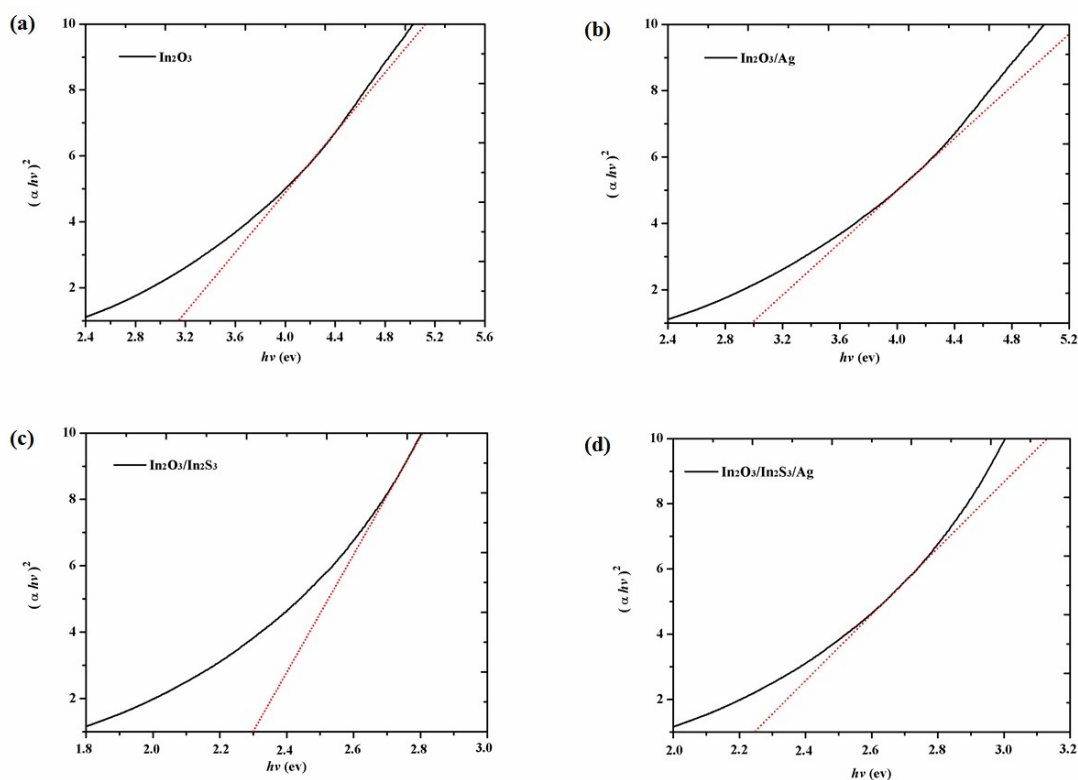

Fig. S2.  $(\alpha h\nu)^2$  vs  $h\nu$  curves for the  $\text{In}_2\text{O}_3$ ,  $\text{In}_2\text{O}_3/\text{Ag}$ ,  $\text{In}_2\text{O}_3/\text{In}_2\text{S}_3$  and  $\text{In}_2\text{O}_3/\text{In}_2\text{S}_3/\text{Ag}$  nanocubes

## Reference

- [1] J.Y. Gan, X.H. Lu, T. Zhai, Y.F. Zhao, S.L. Xie, Y.C. Mao, Y.L. Zhang, Y.Y. Yang and Y.X. Tong, *J. Mater. Chem.*, 2011, **21**, 14685.
